# Supplementary material
Source: Research Square preprint supplement (doi:10.21203/rs.3.rs-9891767/v1)
Supplement: Supplementary file 1 [file 94b4f710a3844d802b71f3f7.docx]

**Table Supplementary 1. Fit Indices for Latent Profile Analysis Models**

| **Model** | **Covariance parameterizations** | **K** | **Log-Likelihood** | **AIC** | **BIC** | **SABIC** | **Entropy** | **BLRT**  **p** |
| --- | --- | --- | --- | --- | --- | --- | --- | --- |
| 1 | EEI | 2 | −996.83 | 2025.66 | 2074.86 | 2024.21 | .987 | — |
| **1** | **EEI** | **3** | **−859.23** | **1762.45** | **1830.10** | **1760.46** | **.977** | **.010** |
| 2 | VVI | 2 | −967.17 | 1976.34 | 2040.92 | 1974.44 | .995 | — |
| 2 | VVI | 3 | −837.51 | 1739.02 | 1837.43 | 1736.13 | .986 | — |
| 3 | EEE | 2 | −902.67 | 1857.33 | 1937.29 | 1854.98 | .998 | — |
| 3 | EEE | 3 | −850.17 | 1764.34 | 1862.75 | 1761.45 | .982 | — |
| 6 | VVV | 2 | −869.55 | 1821.11 | 1947.19 | 1817.40 | .999 | — |
| 6 | VVV | 3 | −822.80 | 1769.60 | 1960.26 | 1763.99 | .980 | — |

Note. AIC = Akaike Information Criterion; BIC = Bayesian Information Criterion; SABIC = sample-size-adjusted BIC; BLRT = Bootstrapped Likelihood Ratio Test; EEI = variances equal across profiles, covariances fixed to zero; VVI = variances freely estimated per profile, covariances fixed to zero; EEE = variances and covariances freely estimated, constrained equal across profiles; VVV = variances and covariances freely estimated per profile, unconstrained. *K* = number of latent classes. Lower AIC, BIC, and SABIC values indicate better fit. Entropy ≥ .80 indicates acceptable overall classification accuracy. BLRT *p*-value is reported for the selected model only, comparing the *k* = 3 solution against the *k* = 2 baseline within the EEI parameterization: *df* = 6 (difference in free parameters between models). Bold row indicates the selected model.

**Table supplementary 2. GLMM Fixed-Effect Results Across Three Outcomes: Main Effects and Interaction Terms.**

| **Predictor** | **Intervention Completion** | | **7-Day PPA** | | **Quit Attempts (>24h)** | |
| --- | --- | --- | --- | --- | --- | --- |
|  | **OR [95% CI]** | **P** | **OR [95% CI]** | **p** | **OR [95% CI]** | **p** |
| **Main Effects** | | | | | | |
| Intercept | 14.12 [4.09, 48.79] | <.001 | 0.18 [0.10,0.30] | <.001 | 0.56 [0.29, 1.07] | .081**†** |
| Group (Nurse-led+PS vs. Nurse-led) | 2.21 [0.19, 26.38] | .531 | 3.42 [1.57,7.46] | .022* | 3.20 [0.87, 11.82] | .081**†** |
| Profile 2 vs. Profile 1 | 0.62 [0.15, 2.65] | .519 | 0.18 [0.06,0.53] | .002* | 0.33 [0.13, 0.86] | .023* |
| Profile 3 vs. Profile 1 | 0.25 [0.06, 1.11] | .069**†** | 0.17 [0.04,0.67] | .010* | 0.34 [0.11, 1.02] | .054**†** |
| **Interaction Effects (Group × Profile)** | | | | | | |
| Group × Profile 2 | 0.85 [0.05, 15.45] | .912 | 0.99 [0.12,8.46] | .996 | 1.39 [0.21, 9.25] | .733 |
| Group × Profile 3 | 2.66 [0.13, 53.61] | .523 | 1.23[0.08,18.63] | .880 | 1.12 [0.12, 10.12] | .922 |
| **Omnibus Interaction Test** | | | | | | |
| Arm × Profile, χ²(2) | 1.04 | .595 | 0.03 | .987 | 0.12 | .942 |

**Note. OR = odds ratio; CI = confidence interval; PS = peer support; Profile 1 = High Readiness /**

**Low Dependence/ high Psychosocial Resources, Profile 2 = Low Readiness / Moderate Dependence / Psychosocially Burdened. Profile 3 = High Readiness / High Dependence / Lower Self-Efficacy. Omnibus interaction evaluated via likelihood ratio test. All tests are two-sided (α = .05). Given the pilot nature of this study, interaction effects and main effects with p < .10 are treated as preliminary signals. * p < .05 (bold). † Preliminary signal, p < .10 (bold black). For outcomes where the random intercept variance was estimated as zero (singular fit), the model reduces to a logistic regression with fixed effects only, implying that inferences are dominated by individual-level variability rather than school-level differences.**

**Table supplementary 3. Simple Effects of Intervention Arm Within Each Latent Profile: Estimated Marginal Means and Odds Ratios**

| **Outcome** | **Profile** | **Nurse-Led Mean (95% CI)** | **Nurse-Led+PS Mean (95% CI)** | **OR (95% CI)** | **p** |
| --- | --- | --- | --- | --- | --- |
| **Intervention Completion (>75% sessions)** | **1** | 0.90 [0.69, 0.98] | 0.95 [0.74, 0.99] | 2.21 [0.19, 26.38] | .531 |
| **2** | 0.86 [0.71, 0.94] | 0.92 [0.79, 0.98] | 1.88 [0.41, 8.47] | .414 |
| **3*** | 0.59 [0.38, 0.77] | 0.89 [0.66, 0.97] | **5.88 [1.08, 32.01]** | **.040*** |
| **Co-verified Self-Reported PPA7** | **1** | 0.24 [0.10, 0.46] | 0.50 [0.30, 0.70] | **3.20 [0.86, 11.89]** | **.081†** |
| **2** | 0.05 [0.01, 0.19] | 0.15 [0.07, 0.30] | 3.18 [0.60, 16.92] | .174 |
| **3** | 0.05 [0.01, 0.26] | 0.16 [0.05, 0.39] | 3.94 [0.60, 25.92] | .254 |
| **Quit Attempts (>24 Hours)** | **1** | 0.24 [0.10, 0.46] | 0.50 [0.30, 0.70] | **3.20 [0.87, 11.82]** | **.081†** |
| **2*** | 0.08 [0.03, 0.22] | 0.28 [0.16, 0.44] | **4.45 [1.13, 17.54]** | **.033*** |
| **3** | 0.09 [0.02, 0.30] | 0.26 [0.11, 0.50] | 3.57 [0.60, 21.10] | .160 |

Note. Means are estimated marginal probabilities (proportions) with 95% confidence intervals derived from the GLMM. OR = odds ratio comparing nurse-led with peer support versus nurse-led only within each latent profile. Profile 1 = High Readiness /Low Dependence/ high Psychosocial Resources; Profile 2 = Low Readiness / Moderate Dependence / Psychosocially Burdened; Profile 3 = High Readiness / High Dependence / Lower Self-Efficacy. All tests are two-sided (α = .05). Given the pilot nature of this study, effects with p < .10 are treated as preliminary signals warranting further investigation. * p < .05 (bold red). † Preliminary signal, p < .10 (bold brown).
